# Supplementary material for: Assessing the Impact of Land Use and Landscape Patterns on Water Quality in Yilong Lake Basin (1993–2023)
Source: Research Square preprint supplement (doi:10.21203/rs.3.rs-7119035/v1), 2025-08-12
Supplement: Supplementary file 1 [file f8bf80c6711488809980293b.xlsx]

## Sheet: Sheet1
Yilong Lake water quality indicators (1993–2023) mg/L
YEAR	TN	NH4+-N	TP	Chl-a	DO	IMn	BOD5
1993	5.55833	0.918333	0.0766667	0.0824583	6.70667	22.3367	9.49167
1995	4.10167	0.506667	0.075	0.06413	6.25167	14.4567	5.95
1997	3.05722	0.484167	0.0647778	0.0423456	6.28889	10.8814	4.62361
1999	2.3625	0.128333	0.0474167	0.0248806	5.5625	10.0914	3.20944
2001	2.25139	0.146389	0.0415	0.0334389	5.42056	10.3933	3.68583
2003	2.14275	0.169667	0.041625	0.0307853	4.94111	10.8716	3.65544
2005	2.28875	0.147639	0.0575139	0.0255208	5.26764	10.7629	3.46806
2007	2.35486	0.338194	0.0756944	0.036854	5.64431	10.0592	3.91056
2009	4.97292	0.351667	0.126444	0.163888	6.96708	22.2433	12.9142
2011	4.83319	0.551944	0.162889	0.16081	6.88069	24.17	10.2519
2013	4.16264	0.334861	0.112042	0.0950882	6.55278	21.8678	5.6175
2015	2.41375	0.209958	0.0527917	0.0464456	6.30444	16.8803	3.88875
2017	1.97967	0.135875	0.0555833	0.0553236	7.87542	10.5	3.67417
2019	1.92014	0.181597	0.0514861	0.0833472	6.84639	8.79306	4.99444
2021	2.32153	0.159167	0.0638611	0.0984583	7.565	12.2111	5.60139
2023	1.98414	0.167067	0.0667229	0.0606753	7.40933	11.0236	4.22965
