# Supplementary material for: Assessing the Impact of Land Use and Landscape Patterns on Water Quality in Yilong Lake Basin (1993–2023)
Source: Research Square preprint supplement (doi:10.21203/rs.3.rs-7119035/v1), 2025-08-12
Supplement: Supplementary file 2 [file fbc7d96e9108404b91c18919.xlsx]

## Sheet: WQ&Overall_Landscape
		TN	NH4+-N	TP	CHl-a	DO	CODMn	BOD5	PD	LPI	ED	LSI	CONTAG	COHESION	SHDI
TN	rValue	1	.848**	.755**	.683**	0.178	.899**	.864**	0.459	0.276	0.161	0.15	-0.199	0.179	0.141
	pValue		0	0.001	0.004	0.508	0	0	0.074	0.3	0.55	0.579	0.461	0.506	0.603
NH4+-N	rValue	.848**	1	0.488	0.383	0.12	.653**	.627**	0.419	0.448	-0.022	-0.035	0.058	0.349	-0.012
	pValue	0		0.055	0.143	0.657	0.006	0.009	0.106	0.082	0.935	0.899	0.831	0.186	0.965
TP	rValue	.755**	0.488	1	.862**	0.335	.822**	.798**	0.226	0.092	0.192	0.19	-0.452	0.097	0.169
	pValue	0.001	0.055		0	0.205	0	0	0.4	0.734	0.477	0.482	0.079	0.721	0.532
CHla	rValue	.683**	0.383	.862**	1	.578*	.762**	.896**	0.196	0.144	0.083	0.084	-0.214	0.166	-0.021
	pValue	0.004	0.143	0		0.019	0.001	0	0.467	0.594	0.759	0.757	0.426	0.538	0.937
DO	rValue	0.178	0.12	0.335	.578*	1	0.269	0.374	0.025	.565*	-0.266	-0.263	0.277	.644**	-.748**
	pValue	0.508	0.657	0.205	0.019		0.313	0.153	0.927	0.023	0.32	0.324	0.299	0.007	0.001
CODMn	rValue	.899**	.653**	.822**	.762**	0.269	1	.821**	.529*	0.241	0.346	0.331	-0.36	0.137	0.058
	pValue	0	0.006	0	0.001	0.313		0	0.035	0.368	0.189	0.21	0.171	0.612	0.83
BOD5	rValue	.864**	.627**	.798**	.896**	0.374	.821**	1	0.234	0.113	0.043	0.041	-0.214	0.094	0.151
	pValue	0	0.009	0	0	0.153	0		0.383	0.676	0.874	0.88	0.425	0.728	0.576
PD	rValue	0.459	0.419	0.226	0.196	0.025	.529*	0.234	1	0.349	.794**	.790**	-0.382	0.084	0.006
	pValue	0.074	0.106	0.4	0.467	0.927	0.035	0.383		0.185	0	0	0.144	0.757	0.983
LPI	rValue	0.276	0.448	0.092	0.144	.565*	0.241	0.113	0.349	1	-0.114	-0.124	0.362	.955**	-.744**
	pValue	0.3	0.082	0.734	0.594	0.023	0.368	0.676	0.185		0.673	0.648	0.169	0	0.001
ED	rValue	0.161	-0.022	0.192	0.083	-0.266	0.346	0.043	.794**	-0.114	1	.999**	-.760**	-0.346	0.371
	pValue	0.55	0.935	0.477	0.759	0.32	0.189	0.874	0	0.673		0	0.001	0.189	0.158
LSI	rValue	0.15	-0.035	0.19	0.084	-0.263	0.331	0.041	.790**	-0.124	.999**	1	-.768**	-0.352	0.376
	pValue	0.579	0.899	0.482	0.757	0.324	0.21	0.88	0	0.648	0		0.001	0.181	0.151
CONTAG	rValue	-0.199	0.058	-0.452	-0.214	0.277	-0.36	-0.214	-0.382	0.362	-.760**	-.768**	1	0.474	-.605*
	pValue	0.461	0.831	0.079	0.426	0.299	0.171	0.425	0.144	0.169	0.001	0.001		0.064	0.013
COHESION	rValue	0.179	0.349	0.097	0.166	.644**	0.137	0.094	0.084	.955**	-0.346	-0.352	0.474	1	-.796**
	pValue	0.506	0.186	0.721	0.538	0.007	0.612	0.728	0.757	0	0.189	0.181	0.064		0
SHDI	rValue	0.141	-0.012	0.169	-0.021	-.748**	0.058	0.151	0.006	-.744**	0.371	0.376	-.605*	-.796**	1
	pValue	0.603	0.965	0.532	0.937	0.001	0.83	0.576	0.983	0.001	0.158	0.151	0.013	0

## Sheet: WQ&Class_Landscape
		TN	NH4+-N	TP	CHl-a	DO	CODMn	BOD5	Farmland_PLAND	Farmland_PD	Farmland_LPI	Farmland_ED	Farmland_LSI	Farmland_COHESION	Tree_PLAND	Tree_PD	Tree_LPI	Tree_ED	Tree_LSI	Tree_COHESION	Shrub_PLAND	Shrub_PD	Shrub_LPI	Shrub_ED	Shrub_LSI	Shrub_COHESION	Grassland_PLAND	Grassland_PD	Grassland_LPI	Grassland_ED	Grassland_LSI	Grassland_COHESION	Water_PLAND	Water_PD	Water_LPI	Water_ED	Water_LSI	Water_COHESION	Build_PLAND	Build_PD	Build_LPI	Build_ED	Build_LSI	Build_COHESION
TN	rValue	1	.848**	.755**	.683**	0.178	.899**	.864**	0.148	0.085	0.276	0.157	0.042	0.281	-0.432	-0.165	-0.232	-0.384	-0.107	-0.068	.667**	.555*	0.277	.628**	.550*	.540*	0.041	0.376	0.04	0.263	0.391	0.145	0.205	0.079	0.209	-0.325	-0.282	-0.282	-0.36	-0.288	-0.363	-0.349	-0.296	-0.311
	pValue		0	0.001	0.004	0.508	0	0	0.584	0.754	0.3	0.56	0.877	0.291	0.095	0.542	0.386	0.142	0.693	0.803	0.005	0.026	0.299	0.009	0.027	0.031	0.881	0.151	0.882	0.324	0.135	0.591	0.447	0.772	0.438	0.219	0.291	0.289	0.171	0.279	0.167	0.185	0.266	0.241
NH4+-N	rValue	.848**	1	0.488	0.383	0.12	.653**	.627**	0.344	-0.085	0.448	0.077	-0.162	0.428	-.587*	-0.218	-0.446	-.539*	-0.162	-0.183	.700**	.685**	0.26	.692**	.615*	.550*	-0.124	0.422	-0.066	0.072	0.331	0.016	0.334	-0.096	0.352	-.498*	-0.443	-0.163	-0.487	-0.335	-0.442	-0.492	-0.452	-0.484
	pValue	0		0.055	0.143	0.657	0.006	0.009	0.193	0.754	0.082	0.776	0.549	0.099	0.017	0.417	0.083	0.031	0.549	0.499	0.003	0.003	0.331	0.003	0.011	0.027	0.648	0.104	0.808	0.792	0.21	0.953	0.206	0.722	0.182	0.049	0.086	0.545	0.056	0.204	0.086	0.053	0.079	0.057
TP	rValue	.755**	0.488	1	.862**	0.335	.822**	.798**	-0.125	0.037	0.092	0.065	0.135	0.193	0.099	0.069	0.16	-0.031	-0.103	0.168	0.266	-0.012	-0.018	0.168	0.098	0.394	0.061	0.235	0.065	0.255	0.307	0.102	-0.101	0.241	-0.095	-0.14	-0.061	-0.435	0.11	0.039	0.064	0.118	0.123	0.2
	pValue	0.001	0.055		0	0.205	0	0	0.645	0.893	0.734	0.812	0.617	0.473	0.716	0.8	0.555	0.909	0.703	0.534	0.32	0.964	0.947	0.533	0.718	0.132	0.822	0.381	0.81	0.34	0.247	0.707	0.709	0.369	0.725	0.605	0.822	0.092	0.685	0.886	0.813	0.664	0.651	0.458
CHla	rValue	.683**	0.383	.862**	1	.578*	.762**	.896**	0.001	-0.148	0.144	0.029	0.028	0.21	0.198	0.209	0.154	0.148	0.031	0.162	0.065	-0.097	-0.178	0.008	-0.016	0.188	-0.152	0.341	-0.091	0.018	0.265	-0.149	-0.175	0.033	-0.134	-0.212	-0.081	-0.211	0.318	0.292	0.291	0.33	0.352	0.361
	pValue	0.004	0.143	0		0.019	0.001	0	0.996	0.585	0.594	0.916	0.918	0.435	0.462	0.437	0.569	0.585	0.91	0.549	0.81	0.722	0.509	0.978	0.953	0.486	0.574	0.197	0.737	0.947	0.322	0.583	0.517	0.903	0.62	0.43	0.764	0.433	0.23	0.273	0.273	0.211	0.181	0.17
DO	rValue	0.178	0.12	0.335	.578*	1	0.269	0.374	.579*	-.765**	.565*	-0.041	-0.41	.550*	0.4	0.445	0.253	0.341	0.113	0.364	-0.315	-0.376	-0.189	-0.376	-0.415	0.261	-.800**	.576*	-.687**	-.627**	0.206	-.821**	-.522*	-0.099	-0.429	-0.142	0.14	0.119	.657**	.770**	.702**	.641**	.622*	.567*
	pValue	0.508	0.657	0.205	0.019		0.313	0.153	0.019	0.001	0.023	0.879	0.115	0.027	0.125	0.084	0.343	0.196	0.678	0.166	0.234	0.151	0.484	0.151	0.11	0.328	0	0.02	0.003	0.009	0.444	0	0.038	0.716	0.097	0.6	0.604	0.661	0.006	0	0.002	0.008	0.01	0.022
CODMn	rValue	.899**	.653**	.822**	.762**	0.269	1	.821**	0.139	0.09	0.241	0.325	0.208	0.24	-0.152	0.121	-0.008	-0.088	0.015	0.069	.521*	0.278	0.31	0.431	0.333	.508*	0.035	0.459	0.022	0.333	.538*	0.074	-0.164	0.352	-0.169	-0.076	0.044	-.515*	-0.048	-0.038	-0.09	-0.025	0.025	0.021
	pValue	0	0.006	0	0.001	0.313		0	0.607	0.741	0.368	0.22	0.439	0.371	0.575	0.656	0.977	0.746	0.957	0.799	0.039	0.297	0.242	0.095	0.208	0.044	0.899	0.074	0.936	0.207	0.031	0.785	0.543	0.181	0.531	0.78	0.87	0.041	0.86	0.888	0.74	0.927	0.928	0.938
BOD5	rValue	.864**	.627**	.798**	.896**	0.374	.821**	1	-0.05	0.005	0.113	-0.047	-0.019	0.166	-0.096	-0.1	-0.023	-0.181	-0.121	0.05	0.311	0.233	-0.053	0.286	0.258	0.283	0.005	0.253	0.077	0.132	0.206	0.066	0.134	-0.035	0.153	-0.32	-0.276	-0.198	-0.046	-0.021	-0.059	-0.039	-0.006	0.008
	pValue	0	0.009	0	0	0.153	0		0.854	0.984	0.676	0.863	0.944	0.54	0.723	0.712	0.932	0.502	0.655	0.853	0.24	0.385	0.845	0.282	0.336	0.288	0.986	0.345	0.777	0.626	0.444	0.807	0.62	0.897	0.571	0.227	0.3	0.461	0.866	0.939	0.828	0.886	0.982	0.977
Farmland_PLAND	rValue	0.148	0.344	-0.125	0.001	.579*	0.139	-0.05	1	-.710**	.864**	0.328	-0.33	.736**	-0.202	0.421	-0.302	0.107	0.288	-0.059	0.186	0.182	0.265	0.144	0.067	0.44	-.819**	.817**	-.814**	-.517*	0.489	-.803**	-0.407	-0.045	-0.33	-0.156	0.134	0.136	0.172	0.412	0.243	0.174	0.22	0.042
	pValue	0.584	0.193	0.645	0.996	0.019	0.607	0.854		0.002	0	0.216	0.212	0.001	0.453	0.105	0.255	0.693	0.28	0.828	0.489	0.5	0.321	0.594	0.806	0.088	0	0	0	0.04	0.054	0	0.118	0.868	0.213	0.564	0.62	0.614	0.525	0.113	0.365	0.518	0.412	0.878
Farmland_PD	rValue	0.085	-0.085	0.037	-0.148	-.765**	0.09	0.005	-.710**	1	-.700**	0.252	.706**	-.689**	-0.314	-0.27	-0.075	-0.148	0.03	-0.276	0.397	0.339	0.291	0.429	0.465	-0.153	.959**	-0.474	.814**	.874**	-0.003	.928**	0.339	0.392	0.222	0.311	0.048	-0.422	-.550*	-.698**	-.653**	-.498*	-0.423	-0.417
	pValue	0.754	0.754	0.893	0.585	0.001	0.741	0.984	0.002		0.003	0.346	0.002	0.003	0.236	0.312	0.782	0.584	0.913	0.3	0.128	0.199	0.275	0.098	0.07	0.572	0	0.064	0	0	0.99	0	0.199	0.133	0.409	0.241	0.86	0.103	0.027	0.003	0.006	0.05	0.103	0.108
Farmland_LPI	rValue	0.276	0.448	0.092	0.144	.565*	0.241	0.113	.864**	-.700**	1	0.241	-0.328	.971**	-0.145	0.291	-0.247	0.043	0.176	-0.021	0.233	0.155	-0.058	0.162	0.062	0.403	-.761**	.791**	-.801**	-0.453	0.48	-.730**	-0.33	-0.04	-0.249	-0.245	0.032	0.085	0.151	0.404	0.214	0.154	0.2	0.056
	pValue	0.3	0.082	0.734	0.594	0.023	0.368	0.676	0	0.003		0.369	0.215	0	0.593	0.274	0.356	0.875	0.515	0.937	0.385	0.567	0.832	0.549	0.818	0.121	0.001	0	0	0.078	0.06	0.001	0.211	0.884	0.353	0.361	0.905	0.755	0.576	0.12	0.426	0.57	0.457	0.836
Farmland_ED	rValue	0.157	0.077	0.065	0.029	-0.041	0.325	-0.047	0.328	0.252	0.241	1	.781**	0.16	-0.361	.688**	-0.425	.525*	.832**	-.520*	.561*	0.299	0.453	0.496	0.478	0.221	0.139	.642**	-0.047	.556*	.897**	0.023	-.530*	.743**	-.587*	.560*	.651**	-.571*	-0.025	0.047	-0.129	0.084	0.268	0.047
	pValue	0.56	0.776	0.812	0.916	0.879	0.22	0.863	0.216	0.346	0.369		0	0.555	0.17	0.003	0.101	0.037	0	0.039	0.024	0.26	0.078	0.051	0.061	0.411	0.608	0.007	0.864	0.025	0	0.931	0.035	0.001	0.017	0.024	0.006	0.021	0.928	0.863	0.635	0.756	0.316	0.864
Farmland_LSI	rValue	0.042	-0.162	0.135	0.028	-0.41	0.208	-0.019	-0.33	.706**	-0.328	.781**	1	-0.32	-0.233	0.424	-0.237	0.471	.665**	-0.497	0.43	0.176	0.255	0.395	0.436	-0.078	.666**	0.111	0.473	.884**	.577*	.540*	-0.26	.763**	-0.367	.652**	.555*	-.658**	-0.133	-0.218	-0.284	-0.024	0.135	0.022
	pValue	0.877	0.549	0.617	0.918	0.115	0.439	0.944	0.212	0.002	0.215	0		0.228	0.385	0.101	0.376	0.066	0.005	0.05	0.096	0.514	0.34	0.129	0.091	0.773	0.005	0.682	0.064	0	0.019	0.031	0.331	0.001	0.162	0.006	0.026	0.006	0.623	0.417	0.287	0.93	0.618	0.934
Farmland_COHESION	rValue	0.281	0.428	0.193	0.21	.550*	0.24	0.166	.736**	-.689**	.971**	0.16	-0.32	1	-0.077	0.244	-0.19	0.046	0.132	0.006	0.19	0.083	-0.226	0.111	0.019	0.352	-.710**	.719**	-.761**	-0.424	0.432	-.671**	-0.291	-0.046	-0.21	-0.274	-0.015	0.063	0.176	0.401	0.231	0.177	0.216	0.104
	pValue	0.291	0.099	0.473	0.435	0.027	0.371	0.54	0.001	0.003	0	0.555	0.228		0.778	0.363	0.481	0.865	0.627	0.981	0.481	0.759	0.401	0.682	0.943	0.181	0.002	0.002	0.001	0.102	0.095	0.004	0.274	0.865	0.435	0.304	0.957	0.816	0.515	0.124	0.389	0.513	0.422	0.702
Tree_PLAND	rValue	-0.432	-.587*	0.099	0.198	0.4	-0.152	-0.096	-0.202	-0.314	-0.145	-0.361	-0.233	-0.077	1	0.191	.772**	0.463	-0.212	.622*	-.856**	-.976**	-0.431	-.933**	-.956**	-0.238	-0.248	-0.214	-0.172	-0.375	-0.332	-0.34	-.515*	0.021	-0.473	0.223	0.327	0.085	.835**	.699**	.822**	.796**	.676**	.806**
	pValue	0.095	0.017	0.716	0.462	0.125	0.575	0.723	0.453	0.236	0.593	0.17	0.385	0.778		0.479	0	0.071	0.43	0.01	0	0	0.095	0	0	0.374	0.355	0.425	0.524	0.152	0.21	0.197	0.041	0.938	0.064	0.406	0.216	0.755	0	0.003	0	0	0.004	0
Tree_PD	rValue	-0.165	-0.218	0.069	0.209	0.445	0.121	-0.1	0.421	-0.27	0.291	.688**	0.424	0.244	0.191	1	-0.082	.839**	.799**	-0.181	-0.073	-0.282	0.045	-0.134	-0.111	-0.044	-0.308	.658**	-0.327	0.033	.677**	-0.464	-.823**	0.481	-.817**	0.466	.685**	-0.356	.636**	.654**	.572*	.705**	.793**	.665**
	pValue	0.542	0.417	0.8	0.437	0.084	0.656	0.712	0.105	0.312	0.274	0.003	0.101	0.363	0.479		0.762	0	0	0.502	0.788	0.29	0.869	0.62	0.682	0.871	0.246	0.006	0.217	0.903	0.004	0.07	0	0.06	0	0.069	0.003	0.177	0.008	0.006	0.021	0.002	0	0.005
Tree_LPI	rValue	-0.232	-0.446	0.16	0.154	0.253	-0.008	-0.023	-0.302	-0.075	-0.247	-0.425	-0.237	-0.19	.772**	-0.082	1	0.117	-0.436	.923**	-.672**	-.713**	-0.286	-.713**	-.739**	-0.19	-0.054	-0.415	0.008	-0.253	-0.448	-0.071	-0.246	0.002	-0.226	0.08	0.123	0.022	0.496	0.312	.514*	0.427	0.269	0.478
	pValue	0.386	0.083	0.555	0.569	0.343	0.977	0.932	0.255	0.782	0.356	0.101	0.376	0.481	0	0.762		0.666	0.091	0	0.004	0.002	0.284	0.002	0.001	0.481	0.841	0.11	0.976	0.344	0.082	0.794	0.358	0.995	0.399	0.769	0.649	0.937	0.051	0.239	0.042	0.099	0.314	0.061
Tree_ED	rValue	-0.384	-.539*	-0.031	0.148	0.341	-0.088	-0.181	0.107	-0.148	0.043	.525*	0.471	0.046	0.463	.839**	0.117	1	.767**	-0.098	-0.352	-.557*	-0.181	-0.413	-0.36	-0.234	-0.141	0.369	-0.207	0.07	0.439	-0.329	-.809**	0.487	-.814**	.675**	.792**	-0.197	.716**	.687**	.625**	.789**	.869**	.757**
	pValue	0.142	0.031	0.909	0.585	0.196	0.746	0.502	0.693	0.584	0.875	0.037	0.066	0.865	0.071	0	0.666		0.001	0.717	0.181	0.025	0.501	0.112	0.171	0.383	0.603	0.159	0.442	0.795	0.089	0.213	0	0.056	0	0.004	0	0.463	0.002	0.003	0.01	0	0	0.001
Tree_LSI	rValue	-0.107	-0.162	-0.103	0.031	0.113	0.015	-0.121	0.288	0.03	0.176	.832**	.665**	0.132	-0.212	.799**	-0.436	.767**	1	-.558*	0.226	0.089	0.104	0.214	0.29	-0.076	-0.008	.584*	-0.131	0.323	.731**	-0.147	-.527*	.508*	-.560*	.565*	.629**	-0.277	0.2	0.273	0.112	0.307	0.483	0.264
	pValue	0.693	0.549	0.703	0.91	0.678	0.957	0.655	0.28	0.913	0.515	0	0.005	0.627	0.43	0	0.091	0.001		0.025	0.4	0.744	0.703	0.426	0.276	0.778	0.976	0.018	0.629	0.223	0.001	0.587	0.036	0.044	0.024	0.023	0.009	0.299	0.458	0.306	0.68	0.247	0.058	0.323
Tree_COHESION	rValue	-0.068	-0.183	0.168	0.162	0.364	0.069	0.05	-0.059	-0.276	-0.021	-.520*	-0.497	0.006	.622*	-0.181	.923**	-0.098	-.558*	1	-.582*	-.540*	-0.227	-.606*	-.652**	-0.052	-0.267	-0.296	-0.159	-0.45	-0.46	-0.222	-0.13	-0.191	-0.08	-0.155	-0.072	0.168	0.39	0.274	0.461	0.294	0.113	0.333
	pValue	0.803	0.499	0.534	0.549	0.166	0.799	0.853	0.828	0.3	0.937	0.039	0.05	0.981	0.01	0.502	0	0.717	0.025		0.018	0.031	0.398	0.013	0.006	0.847	0.317	0.265	0.557	0.08	0.073	0.409	0.632	0.479	0.767	0.565	0.791	0.533	0.136	0.305	0.072	0.268	0.677	0.208
Shrub_PLAND	rValue	.667**	.700**	0.266	0.065	-0.315	.521*	0.311	0.186	0.397	0.233	.561*	0.43	0.19	-.856**	-0.073	-.672**	-0.352	0.226	-.582*	1	.874**	.553*	.978**	.920**	.519*	0.301	0.4	0.148	.586*	.613*	0.369	0.243	0.346	0.186	-0.072	-0.097	-0.465	-.724**	-.604*	-.765**	-.661**	-.508*	-.661**
	pValue	0.005	0.003	0.32	0.81	0.234	0.039	0.24	0.489	0.128	0.385	0.024	0.096	0.481	0	0.788	0.004	0.181	0.4	0.018		0	0.026	0	0	0.039	0.256	0.125	0.583	0.017	0.012	0.16	0.364	0.189	0.49	0.792	0.721	0.07	0.002	0.013	0.001	0.005	0.045	0.005
Shrub_PD	rValue	.555*	.685**	-0.012	-0.097	-0.376	0.278	0.233	0.182	0.339	0.155	0.299	0.176	0.083	-.976**	-0.282	-.713**	-.557*	0.089	-.540*	.874**	1	0.431	.949**	.952**	0.262	0.258	0.196	0.199	0.37	0.292	0.362	.561*	-0.063	.526*	-0.303	-0.403	-0.081	-.857**	-.719**	-.837**	-.826**	-.717**	-.833**
	pValue	0.026	0.003	0.964	0.722	0.151	0.297	0.385	0.5	0.199	0.567	0.26	0.514	0.759	0	0.29	0.002	0.025	0.744	0.031	0		0.096	0	0	0.328	0.335	0.468	0.459	0.158	0.272	0.168	0.024	0.818	0.036	0.253	0.122	0.766	0	0.002	0	0	0.002	0
Shrub_LPI	rValue	0.277	0.26	-0.018	-0.178	-0.189	0.31	-0.053	0.265	0.291	-0.058	0.453	0.255	-0.226	-0.431	0.045	-0.286	-0.181	0.104	-0.227	.553*	0.431	1	.502*	0.413	.652**	0.149	0.251	0.061	0.346	0.416	0.169	-0.115	0.452	-0.175	0.243	0.271	-0.418	-0.377	-0.338	-0.415	-0.344	-0.272	-0.381
	pValue	0.299	0.331	0.947	0.509	0.484	0.242	0.845	0.321	0.275	0.832	0.078	0.34	0.401	0.095	0.869	0.284	0.501	0.703	0.398	0.026	0.096		0.047	0.112	0.006	0.583	0.348	0.822	0.189	0.109	0.531	0.672	0.079	0.517	0.365	0.31	0.107	0.15	0.2	0.11	0.192	0.309	0.145
Shrub_ED	rValue	.628**	.692**	0.168	0.008	-0.376	0.431	0.286	0.144	0.429	0.162	0.496	0.395	0.111	-.933**	-0.134	-.713**	-0.413	0.214	-.606*	.978**	.949**	.502*	1	.977**	0.384	0.344	0.307	0.228	.563*	.506*	0.42	0.383	0.21	0.327	-0.136	-0.208	-0.34	-.796**	-.680**	-.821**	-.740**	-.598*	-.734**
	pValue	0.009	0.003	0.533	0.978	0.151	0.095	0.282	0.594	0.098	0.549	0.051	0.129	0.682	0	0.62	0.002	0.112	0.426	0.013	0	0	0.047		0	0.142	0.193	0.248	0.396	0.023	0.046	0.106	0.143	0.436	0.216	0.615	0.439	0.197	0	0.004	0	0.001	0.014	0.001
Shrub_LSI	rValue	.550*	.615*	0.098	-0.016	-0.415	0.333	0.258	0.067	0.465	0.062	0.478	0.436	0.019	-.956**	-0.111	-.739**	-0.36	0.29	-.652**	.920**	.952**	0.413	.977**	1	0.226	0.4	0.235	0.306	.577*	0.447	0.468	0.445	0.144	0.386	-0.126	-0.239	-0.27	-.796**	-.699**	-.821**	-.737**	-.593*	-.722**
	pValue	0.027	0.011	0.718	0.953	0.11	0.208	0.336	0.806	0.07	0.818	0.061	0.091	0.943	0	0.682	0.001	0.171	0.276	0.006	0	0	0.112	0		0.399	0.125	0.382	0.249	0.019	0.083	0.068	0.084	0.594	0.14	0.643	0.373	0.311	0	0.003	0	0.001	0.015	0.002
Shrub_COHESION	rValue	.540*	.550*	0.394	0.188	0.261	.508*	0.283	0.44	-0.153	0.403	0.221	-0.078	0.352	-0.238	-0.044	-0.19	-0.234	-0.076	-0.052	.519*	0.262	.652**	0.384	0.226	1	-0.252	.510*	-0.368	0.041	0.482	-0.166	-0.192	0.384	-0.201	-0.033	0.128	-0.421	-0.22	-0.084	-0.231	-0.201	-0.13	-0.253
	pValue	0.031	0.027	0.132	0.486	0.328	0.044	0.288	0.088	0.572	0.121	0.411	0.773	0.181	0.374	0.871	0.481	0.383	0.778	0.847	0.039	0.328	0.006	0.142	0.399		0.347	0.044	0.161	0.881	0.059	0.538	0.476	0.142	0.455	0.904	0.637	0.104	0.414	0.758	0.389	0.455	0.631	0.344
Grassland_PLAND	rValue	0.041	-0.124	0.061	-0.152	-.800**	0.035	0.005	-.819**	.959**	-.761**	0.139	.666**	-.710**	-0.248	-0.308	-0.054	-0.141	-0.008	-0.267	0.301	0.258	0.149	0.344	0.4	-0.252	1	-.578*	.913**	.867**	-0.101	.973**	0.391	0.338	0.272	0.345	0.032	-0.364	-0.496	-.670**	-.598*	-0.456	-0.418	-0.333
	pValue	0.881	0.648	0.822	0.574	0	0.899	0.986	0	0	0.001	0.608	0.005	0.002	0.355	0.246	0.841	0.603	0.976	0.317	0.256	0.335	0.583	0.193	0.125	0.347		0.019	0	0	0.708	0	0.135	0.2	0.309	0.19	0.907	0.166	0.05	0.005	0.014	0.076	0.107	0.207
Grassland_PD	rValue	0.376	0.422	0.235	0.341	.576*	0.459	0.253	.817**	-0.474	.791**	.642**	0.111	.719**	-0.214	.658**	-0.415	0.369	.584*	-0.296	0.4	0.196	0.251	0.307	0.235	.510*	-.578*	1	-.658**	-0.108	.854**	-.612*	-.583*	0.338	-.545*	0.061	0.356	-0.294	0.227	0.441	0.213	0.29	0.43	0.192
	pValue	0.151	0.104	0.381	0.197	0.02	0.074	0.345	0	0.064	0	0.007	0.682	0.002	0.425	0.006	0.11	0.159	0.018	0.265	0.125	0.468	0.348	0.248	0.382	0.044	0.019		0.006	0.689	0	0.012	0.018	0.2	0.029	0.822	0.176	0.27	0.398	0.087	0.429	0.275	0.096	0.476
Grassland_LPI	rValue	0.04	-0.066	0.065	-0.091	-.687**	0.022	0.077	-.814**	.814**	-.801**	-0.047	0.473	-.761**	-0.172	-0.327	0.008	-0.207	-0.131	-0.159	0.148	0.199	0.061	0.228	0.306	-0.368	.913**	-.658**	1	.695**	-0.278	.893**	0.469	0.13	0.367	0.254	-0.082	-0.218	-0.39	-.574*	-0.457	-0.386	-0.422	-0.234
	pValue	0.882	0.808	0.81	0.737	0.003	0.936	0.777	0	0	0	0.864	0.064	0.001	0.524	0.217	0.976	0.442	0.629	0.557	0.583	0.459	0.822	0.396	0.249	0.161	0	0.006		0.003	0.298	0	0.067	0.633	0.163	0.343	0.764	0.418	0.135	0.02	0.075	0.14	0.104	0.384
Grassland_ED	rValue	0.263	0.072	0.255	0.018	-.627**	0.333	0.132	-.517*	.874**	-0.453	.556*	.884**	-0.424	-0.375	0.033	-0.253	0.07	0.323	-0.45	.586*	0.37	0.346	.563*	.577*	0.041	.867**	-0.108	.695**	1	0.403	.817**	0.071	.671**	-0.052	0.485	0.296	-.665**	-0.433	-.537*	-.570*	-0.348	-0.224	-0.251
	pValue	0.324	0.792	0.34	0.947	0.009	0.207	0.626	0.04	0	0.078	0.025	0	0.102	0.152	0.903	0.344	0.795	0.223	0.08	0.017	0.158	0.189	0.023	0.019	0.881	0	0.689	0.003		0.122	0	0.794	0.004	0.848	0.057	0.266	0.005	0.094	0.032	0.021	0.187	0.404	0.349
Grassland_LSI	rValue	0.391	0.331	0.307	0.265	0.206	.538*	0.206	0.489	-0.003	0.48	.897**	.577*	0.432	-0.332	.677**	-0.448	0.439	.731**	-0.46	.613*	0.292	0.416	.506*	0.447	0.482	-0.101	.854**	-0.278	0.403	1	-0.166	-.577*	.710**	-.607*	0.362	.552*	-.643**	0.044	0.165	-0.044	0.145	0.332	0.103
	pValue	0.135	0.21	0.247	0.322	0.444	0.031	0.444	0.054	0.99	0.06	0	0.019	0.095	0.21	0.004	0.082	0.089	0.001	0.073	0.012	0.272	0.109	0.046	0.083	0.059	0.708	0	0.298	0.122		0.538	0.019	0.002	0.013	0.169	0.027	0.007	0.873	0.541	0.871	0.592	0.209	0.704
Grassland_COHESION	rValue	0.145	0.016	0.102	-0.149	-.821**	0.074	0.066	-.803**	.928**	-.730**	0.023	.540*	-.671**	-0.34	-0.464	-0.071	-0.329	-0.147	-0.222	0.369	0.362	0.169	0.42	0.468	-0.166	.973**	-.612*	.893**	.817**	-0.166	1	.539*	0.232	0.428	0.174	-0.143	-0.317	-.630**	-.798**	-.708**	-.606*	-.582*	-0.479
	pValue	0.591	0.953	0.707	0.583	0	0.785	0.807	0	0	0.001	0.931	0.031	0.004	0.197	0.07	0.794	0.213	0.587	0.409	0.16	0.168	0.531	0.106	0.068	0.538	0	0.012	0	0	0.538		0.031	0.387	0.098	0.518	0.598	0.232	0.009	0	0.002	0.013	0.018	0.061
Water_PLAND	rValue	0.205	0.334	-0.101	-0.175	-.522*	-0.164	0.134	-0.407	0.339	-0.33	-.530*	-0.26	-0.291	-.515*	-.823**	-0.246	-.809**	-.527*	-0.13	0.243	.561*	-0.115	0.383	0.445	-0.192	0.391	-.583*	0.469	0.071	-.577*	.539*	1	-.618*	.990**	-.581*	-.846**	0.39	-.760**	-.774**	-.689**	-.810**	-.863**	-.755**
	pValue	0.447	0.206	0.709	0.517	0.038	0.543	0.62	0.118	0.199	0.211	0.035	0.331	0.274	0.041	0	0.358	0	0.036	0.632	0.364	0.024	0.672	0.143	0.084	0.476	0.135	0.018	0.067	0.794	0.019	0.031		0.011	0	0.018	0	0.135	0.001	0	0.003	0	0	0.001
Water_PD	rValue	0.079	-0.096	0.241	0.033	-0.099	0.352	-0.035	-0.045	0.392	-0.04	.743**	.763**	-0.046	0.021	0.481	0.002	0.487	.508*	-0.191	0.346	-0.063	0.452	0.21	0.144	0.384	0.338	0.338	0.13	.671**	.710**	0.232	-.618*	1	-.713**	.760**	.810**	-.844**	0.09	0.06	-0.053	0.182	0.312	0.208
	pValue	0.772	0.722	0.369	0.903	0.716	0.181	0.897	0.868	0.133	0.884	0.001	0.001	0.865	0.938	0.06	0.995	0.056	0.044	0.479	0.189	0.818	0.079	0.436	0.594	0.142	0.2	0.2	0.633	0.004	0.002	0.387	0.011		0.002	0.001	0	0	0.74	0.824	0.847	0.5	0.24	0.44
Water_LPI	rValue	0.209	0.352	-0.095	-0.134	-0.429	-0.169	0.153	-0.33	0.222	-0.249	-.587*	-0.367	-0.21	-0.473	-.817**	-0.226	-.814**	-.560*	-0.08	0.186	.526*	-0.175	0.327	0.386	-0.201	0.272	-.545*	0.367	-0.052	-.607*	0.428	.990**	-.713**	1	-.669**	-.901**	0.483	-.701**	-.703**	-.613*	-.760**	-.824**	-.718**
	pValue	0.438	0.182	0.725	0.62	0.097	0.531	0.571	0.213	0.409	0.353	0.017	0.162	0.435	0.064	0	0.399	0	0.024	0.767	0.49	0.036	0.517	0.216	0.14	0.455	0.309	0.029	0.163	0.848	0.013	0.098	0	0.002		0.005	0	0.058	0.003	0.002	0.012	0.001	0	0.002
Water_ED	rValue	-0.325	-.498*	-0.14	-0.212	-0.142	-0.076	-0.32	-0.156	0.311	-0.245	.560*	.652**	-0.274	0.223	0.466	0.08	.675**	.565*	-0.155	-0.072	-0.303	0.243	-0.136	-0.126	-0.033	0.345	0.061	0.254	0.485	0.362	0.174	-.581*	.760**	-.669**	1	.919**	-0.388	0.278	0.241	0.155	0.347	0.408	0.388
	pValue	0.219	0.049	0.605	0.43	0.6	0.78	0.227	0.564	0.241	0.361	0.024	0.006	0.304	0.406	0.069	0.769	0.004	0.023	0.565	0.792	0.253	0.365	0.615	0.643	0.904	0.19	0.822	0.343	0.057	0.169	0.518	0.018	0.001	0.005		0	0.138	0.297	0.369	0.566	0.187	0.116	0.138
Water_LSI	rValue	-0.282	-0.443	-0.061	-0.081	0.14	0.044	-0.276	0.134	0.048	0.032	.651**	.555*	-0.015	0.327	.685**	0.123	.792**	.629**	-0.072	-0.097	-0.403	0.271	-0.208	-0.239	0.128	0.032	0.356	-0.082	0.296	.552*	-0.143	-.846**	.810**	-.901**	.919**	1	-0.466	0.488	0.489	0.375	.560*	.637**	.553*
	pValue	0.291	0.086	0.822	0.764	0.604	0.87	0.3	0.62	0.86	0.905	0.006	0.026	0.957	0.216	0.003	0.649	0	0.009	0.791	0.721	0.122	0.31	0.439	0.373	0.637	0.907	0.176	0.764	0.266	0.027	0.598	0	0	0	0		0.069	0.055	0.055	0.152	0.024	0.008	0.026
Water_COHESION	rValue	-0.282	-0.163	-0.435	-0.211	0.119	-.515*	-0.198	0.136	-0.422	0.085	-.571*	-.658**	0.063	0.085	-0.356	0.022	-0.197	-0.277	0.168	-0.465	-0.081	-0.418	-0.34	-0.27	-0.421	-0.364	-0.294	-0.218	-.665**	-.643**	-0.317	0.39	-.844**	0.483	-0.388	-0.466	1	0.031	0.088	0.15	-0.042	-0.152	-0.093
	pValue	0.289	0.545	0.092	0.433	0.661	0.041	0.461	0.614	0.103	0.755	0.021	0.006	0.816	0.755	0.177	0.937	0.463	0.299	0.533	0.07	0.766	0.107	0.197	0.311	0.104	0.166	0.27	0.418	0.005	0.007	0.232	0.135	0	0.058	0.138	0.069		0.909	0.745	0.579	0.877	0.574	0.733
Build_PLAND	rValue	-0.36	-0.487	0.11	0.318	.657**	-0.048	-0.046	0.172	-.550*	0.151	-0.025	-0.133	0.176	.835**	.636**	0.496	.716**	0.2	0.39	-.724**	-.857**	-0.377	-.796**	-.796**	-0.22	-0.496	0.227	-0.39	-0.433	0.044	-.630**	-.760**	0.09	-.701**	0.278	0.488	0.031	1	.942**	.985**	.991**	.924**	.974**
	pValue	0.171	0.056	0.685	0.23	0.006	0.86	0.866	0.525	0.027	0.576	0.928	0.623	0.515	0	0.008	0.051	0.002	0.458	0.136	0.002	0	0.15	0	0	0.414	0.05	0.398	0.135	0.094	0.873	0.009	0.001	0.74	0.003	0.297	0.055	0.909		0	0	0	0	0
Build_PD	rValue	-0.288	-0.335	0.039	0.292	.770**	-0.038	-0.021	0.412	-.698**	0.404	0.047	-0.218	0.401	.699**	.654**	0.312	.687**	0.273	0.274	-.604*	-.719**	-0.338	-.680**	-.699**	-0.084	-.670**	0.441	-.574*	-.537*	0.165	-.798**	-.774**	0.06	-.703**	0.241	0.489	0.088	.942**	1	.944**	.941**	.908**	.887**
	pValue	0.279	0.204	0.886	0.273	0	0.888	0.939	0.113	0.003	0.12	0.863	0.417	0.124	0.003	0.006	0.239	0.003	0.306	0.305	0.013	0.002	0.2	0.004	0.003	0.758	0.005	0.087	0.02	0.032	0.541	0	0	0.824	0.002	0.369	0.055	0.745	0		0	0	0	0
Build_LPI	rValue	-0.363	-0.442	0.064	0.291	.702**	-0.09	-0.059	0.243	-.653**	0.214	-0.129	-0.284	0.231	.822**	.572*	.514*	.625**	0.112	0.461	-.765**	-.837**	-0.415	-.821**	-.821**	-0.231	-.598*	0.213	-0.457	-.570*	-0.044	-.708**	-.689**	-0.053	-.613*	0.155	0.375	0.15	.985**	.944**	1	.957**	.865**	.933**
	pValue	0.167	0.086	0.813	0.273	0.002	0.74	0.828	0.365	0.006	0.426	0.635	0.287	0.389	0	0.021	0.042	0.01	0.68	0.072	0.001	0	0.11	0	0	0.389	0.014	0.429	0.075	0.021	0.871	0.002	0.003	0.847	0.012	0.566	0.152	0.579	0	0		0	0	0
Build_ED	rValue	-0.349	-0.492	0.118	0.33	.641**	-0.025	-0.039	0.174	-.498*	0.154	0.084	-0.024	0.177	.796**	.705**	0.427	.789**	0.307	0.294	-.661**	-.826**	-0.344	-.740**	-.737**	-0.201	-0.456	0.29	-0.386	-0.348	0.145	-.606*	-.810**	0.182	-.760**	0.347	.560*	-0.042	.991**	.941**	.957**	1	.966**	.977**
	pValue	0.185	0.053	0.664	0.211	0.008	0.927	0.886	0.518	0.05	0.57	0.756	0.93	0.513	0	0.002	0.099	0	0.247	0.268	0.005	0	0.192	0.001	0.001	0.455	0.076	0.275	0.14	0.187	0.592	0.013	0	0.5	0.001	0.187	0.024	0.877	0	0	0		0	0
Build_LSI	rValue	-0.296	-0.452	0.123	0.352	.622*	0.025	-0.006	0.22	-0.423	0.2	0.268	0.135	0.216	.676**	.793**	0.269	.869**	0.483	0.113	-.508*	-.717**	-0.272	-.598*	-.593*	-0.13	-0.418	0.43	-0.422	-0.224	0.332	-.582*	-.863**	0.312	-.824**	0.408	.637**	-0.152	.924**	.908**	.865**	.966**	1	.920**
	pValue	0.266	0.079	0.651	0.181	0.01	0.928	0.982	0.412	0.103	0.457	0.316	0.618	0.422	0.004	0	0.314	0	0.058	0.677	0.045	0.002	0.309	0.014	0.015	0.631	0.107	0.096	0.104	0.404	0.209	0.018	0	0.24	0	0.116	0.008	0.574	0	0	0	0		0
Build_COHESION	rValue	-0.311	-0.484	0.2	0.361	.567*	0.021	0.008	0.042	-0.417	0.056	0.047	0.022	0.104	.806**	.665**	0.478	.757**	0.264	0.333	-.661**	-.833**	-0.381	-.734**	-.722**	-0.253	-0.333	0.192	-0.234	-0.251	0.103	-0.479	-.755**	0.208	-.718**	0.388	.553*	-0.093	.974**	.887**	.933**	.977**	.920**	1
	pValue	0.241	0.057	0.458	0.17	0.022	0.938	0.977	0.878	0.108	0.836	0.864	0.934	0.702	0	0.005	0.061	0.001	0.323	0.208	0.005	0	0.145	0.001	0.002	0.344	0.207	0.476	0.384	0.349	0.704	0.061	0.001	0.44	0.002	0.138	0.026	0.733	0	0	0	0	0
